# Supplementary material for: Investigation of Potency and Safety of Live-Attenuated Peste des Petits Ruminant Virus Vaccine in Goats by Detection of Cellular and Humoral Immune Response
Source: MDPI journal article supplement (doi:10.3390/v15061325), 2023-06-05

**Figure S1a. ID rapid PPR antigen dipstick field test results of nasal swab.** Negative (-) control band visible test band not, questionable ((+)) control band visible and barely visible test band, low positive (+) test band visible but not strong color as control band, moderate positive (++) test band same visible color as control band, high positive (+++) test band stronger color than control band.

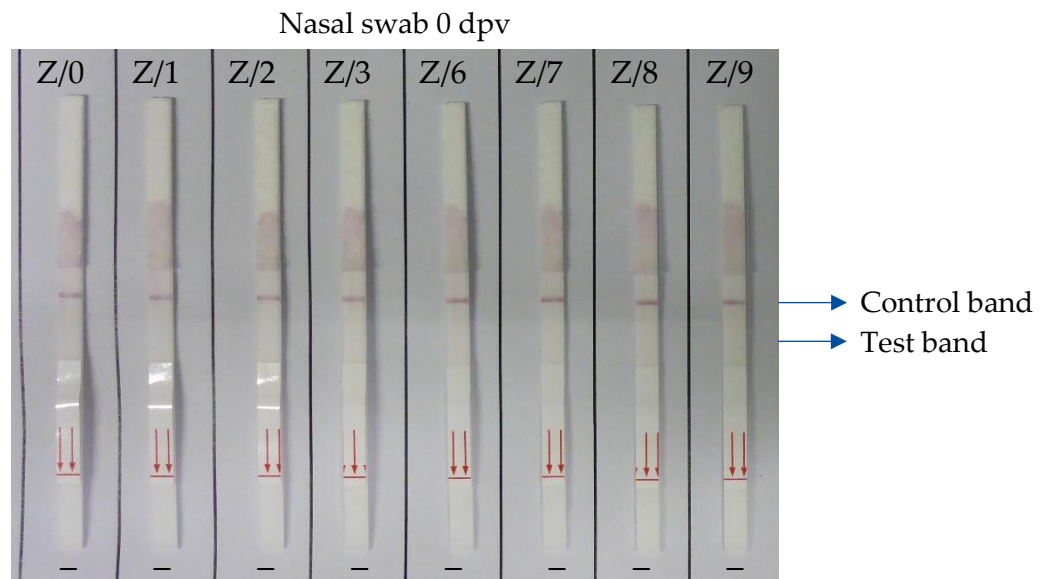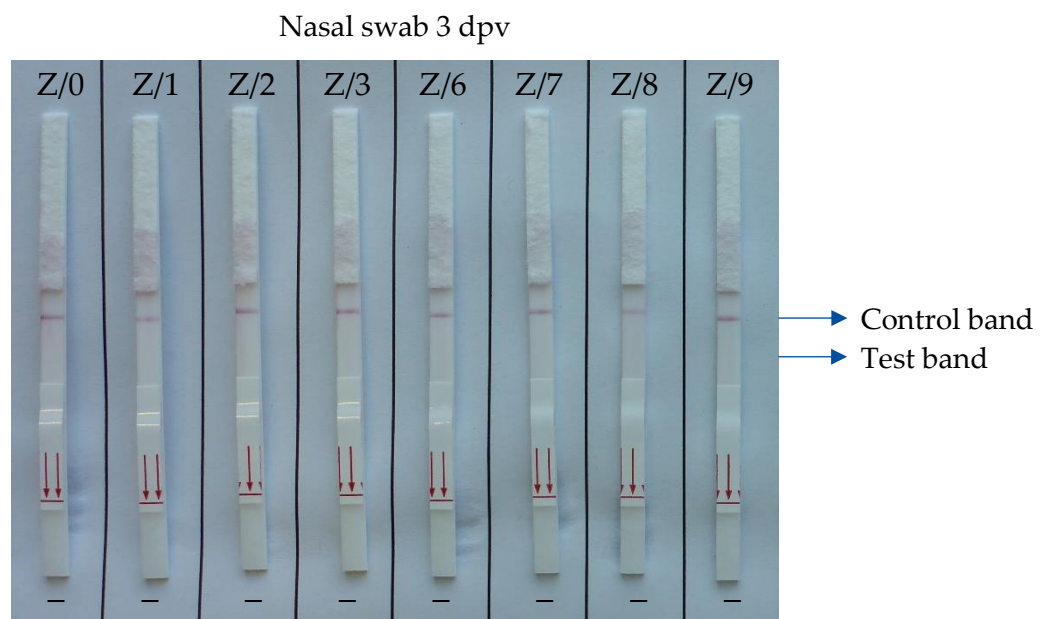

Nasal swab 5 dpv

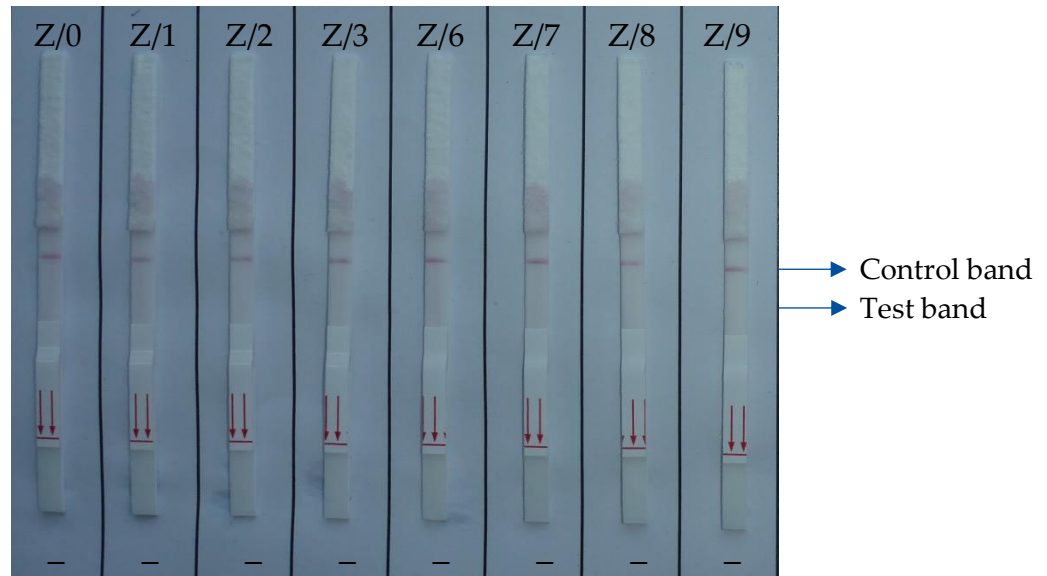

Nasal swab 7 dpv

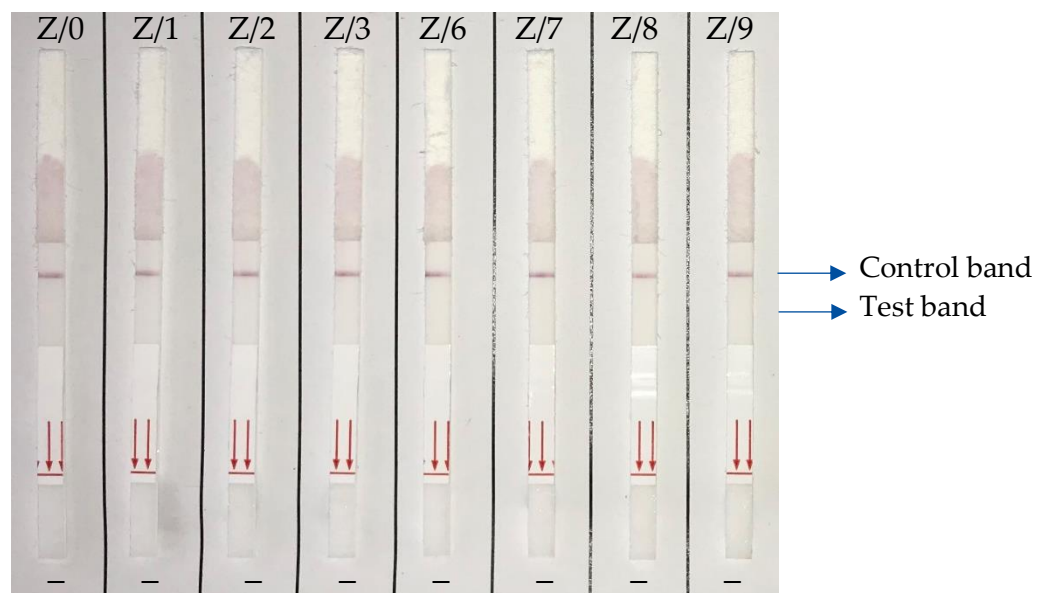

Nasal swab 10 dpv

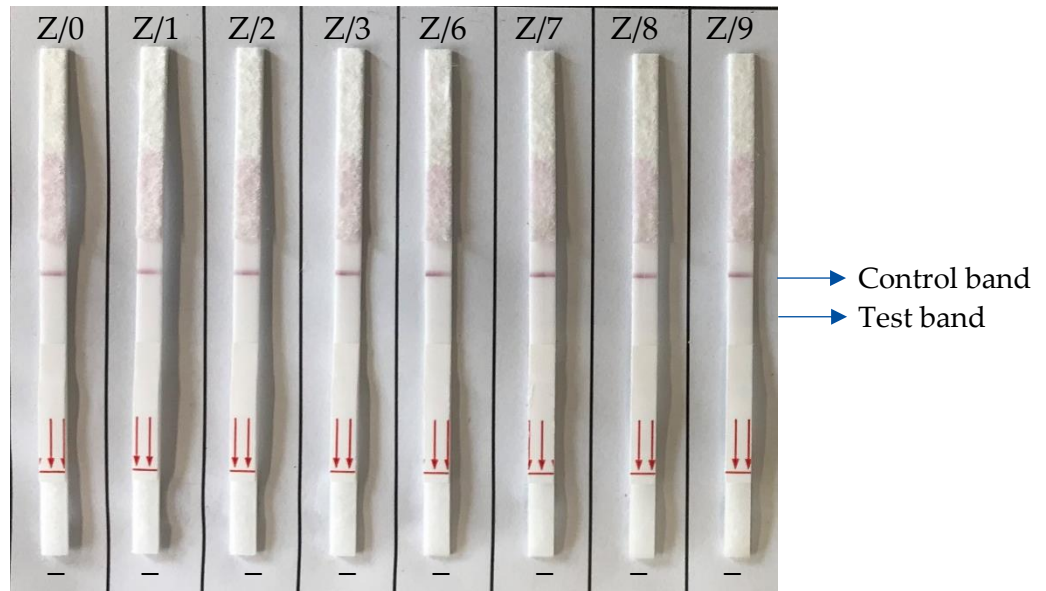

Nasal swab 12 dpv

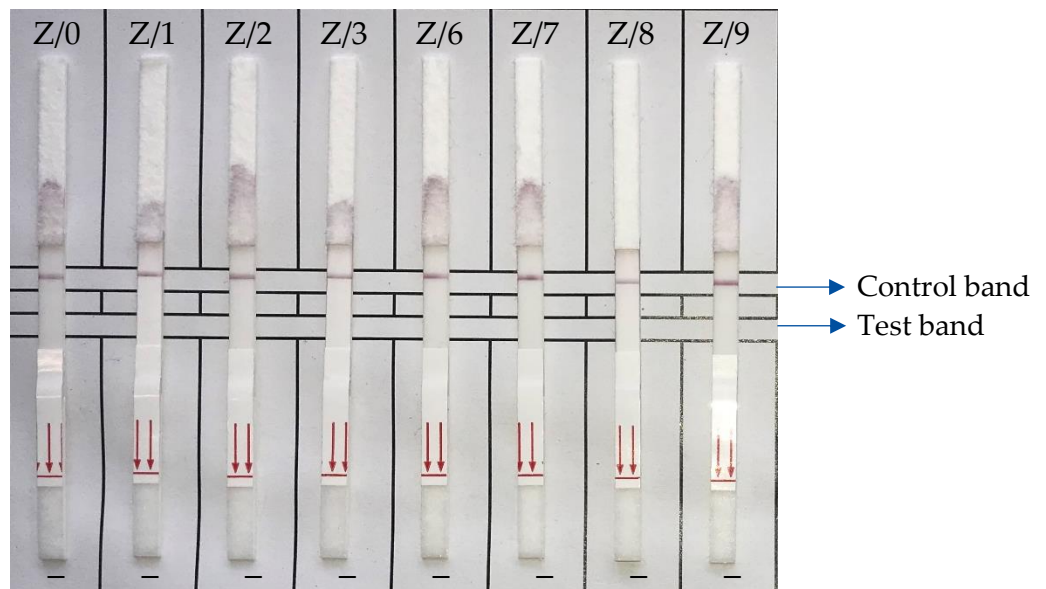

Nasal swab 14 dpv

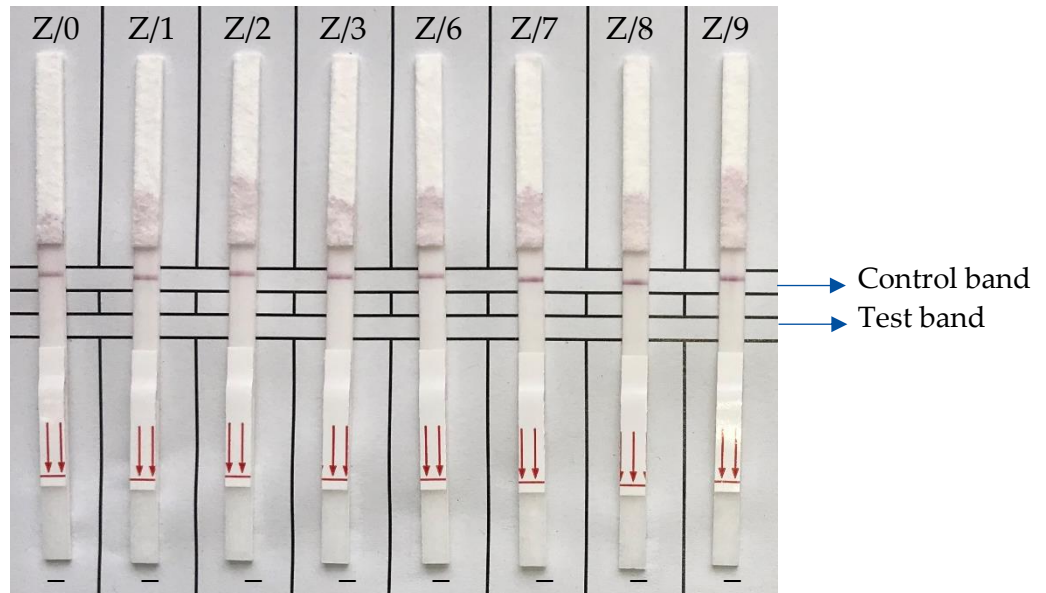

Nasal swab 17 dpv

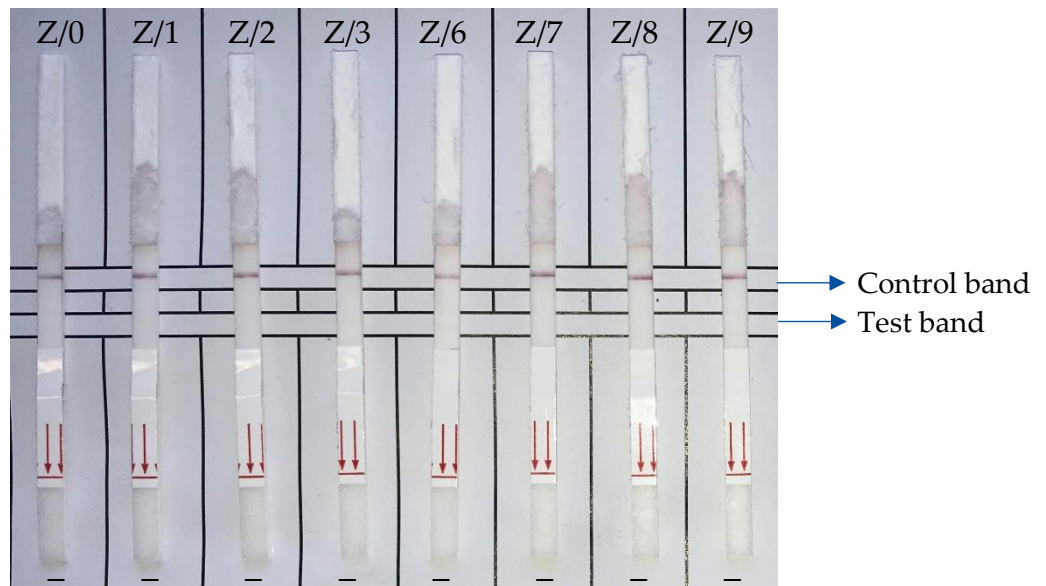

Nasal swab 21 dpv

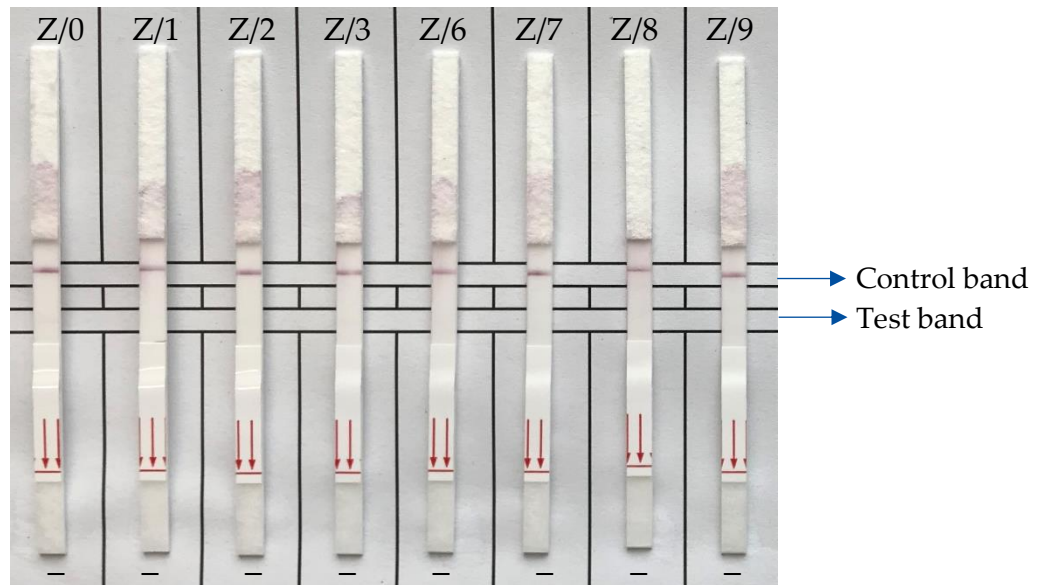

Nasal swab 24 dpv

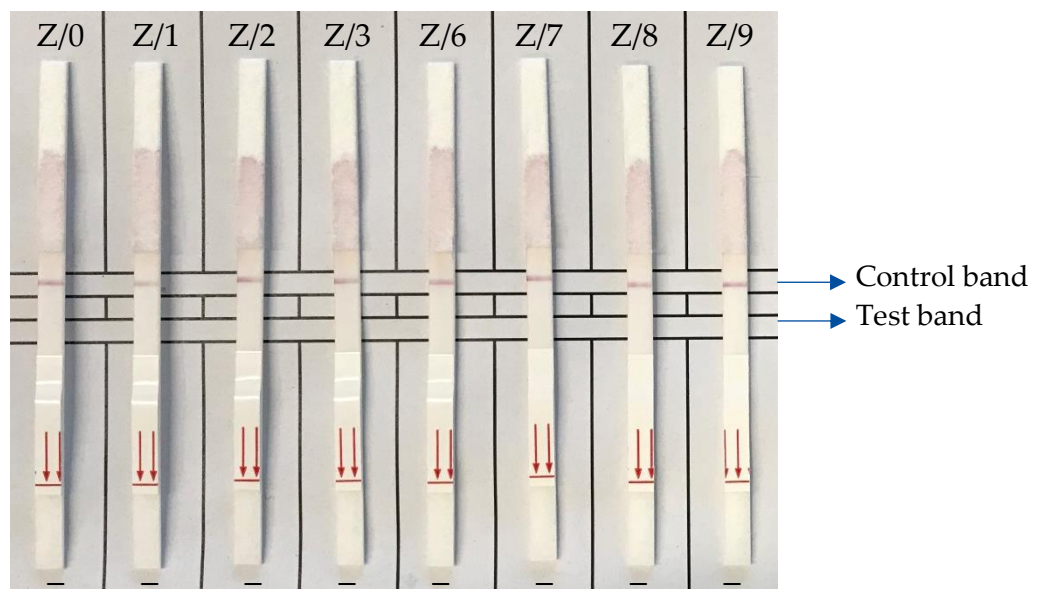



Nasal swab 28 dpv

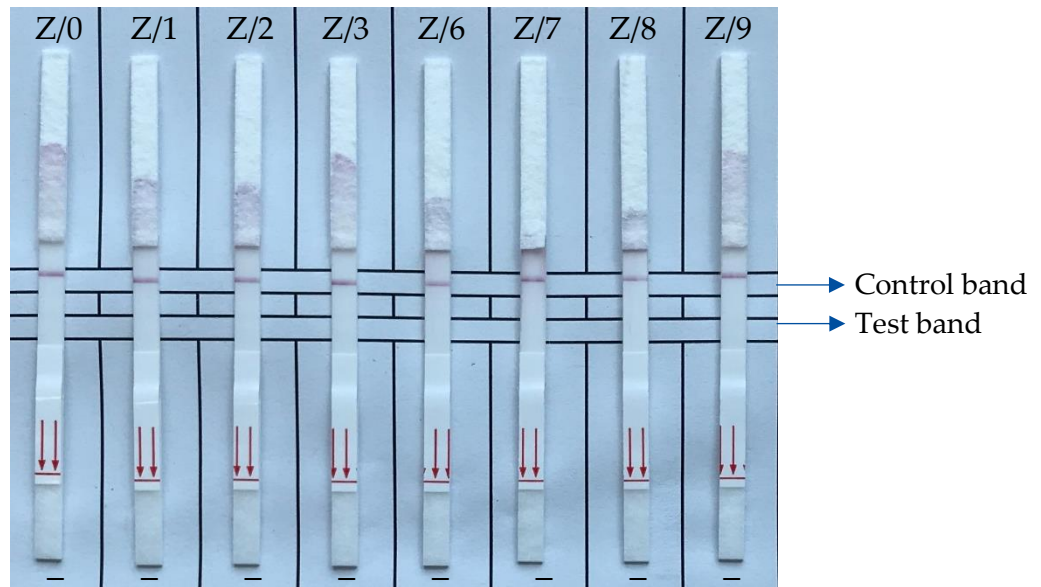

**Figure S1b. ID rapid PPR antigen dipstick field test results of conjunctival swab.** Negative (-) control band visible test band not, questionable ((+)) control band visible and barely visible test band, low positive (+) test band visible but not strong color as control band, moderate positive (++) test band same visible color as control band, high positive (+++) test band stronger color than control band.

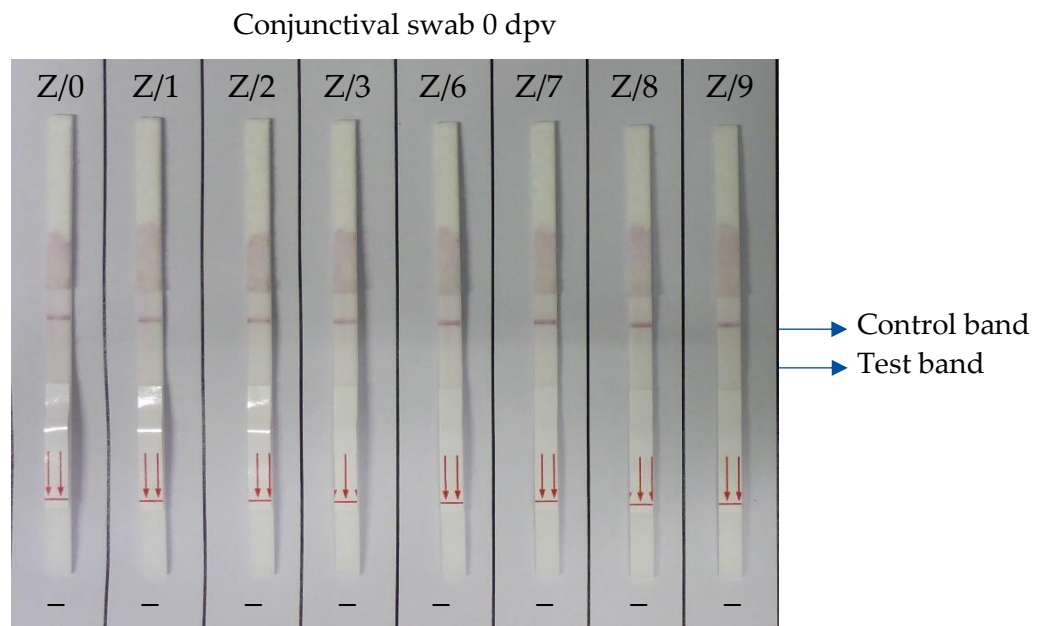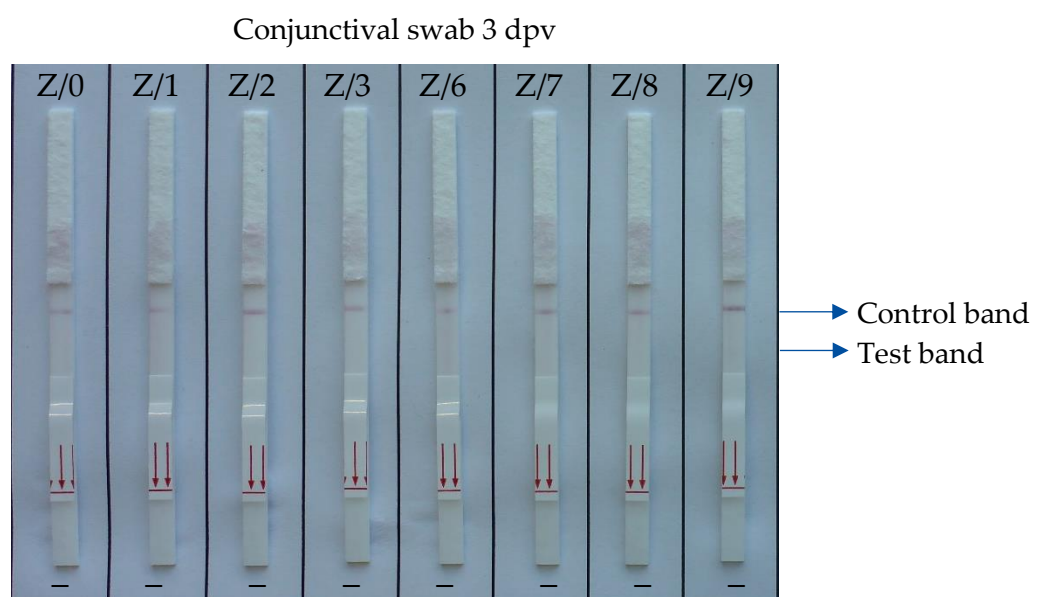

Conjunctival swab 5 dpv

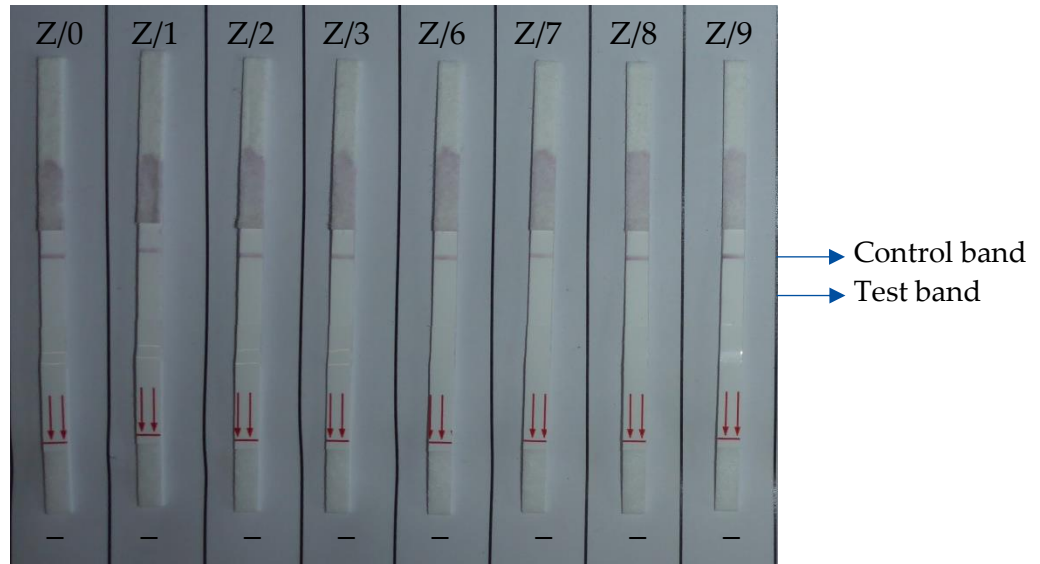

Conjunctival swab 7 dpv

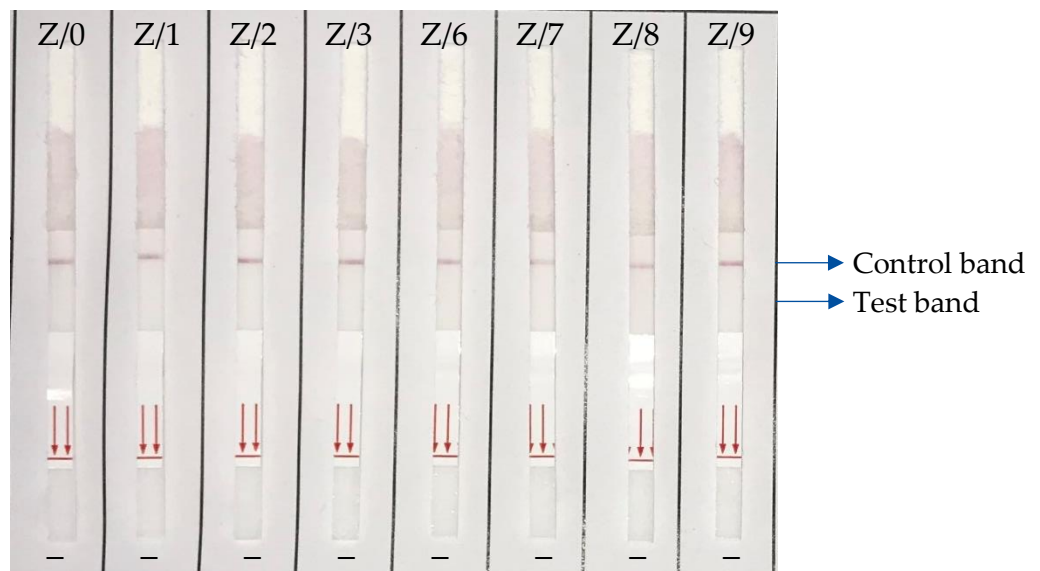



Conjunctival swab 10 dpv

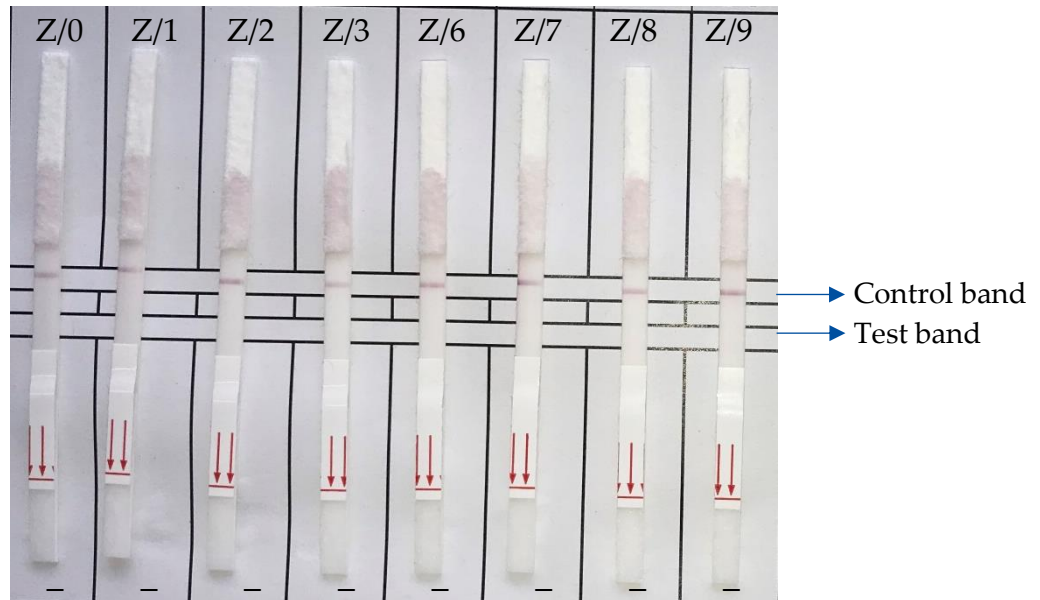

Conjunctival swab 12 dpv

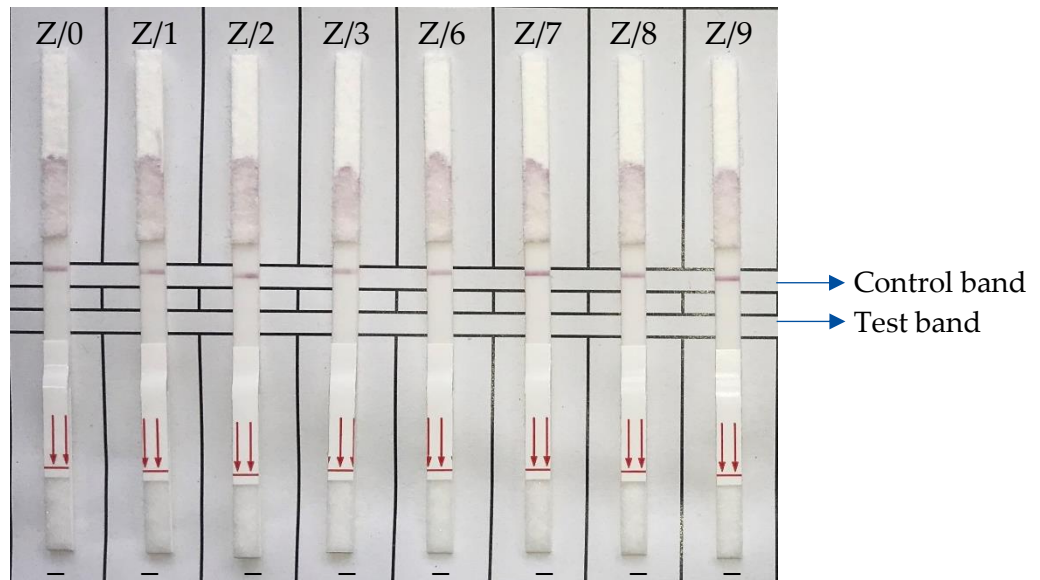

Conjunctival swab 14 dpv

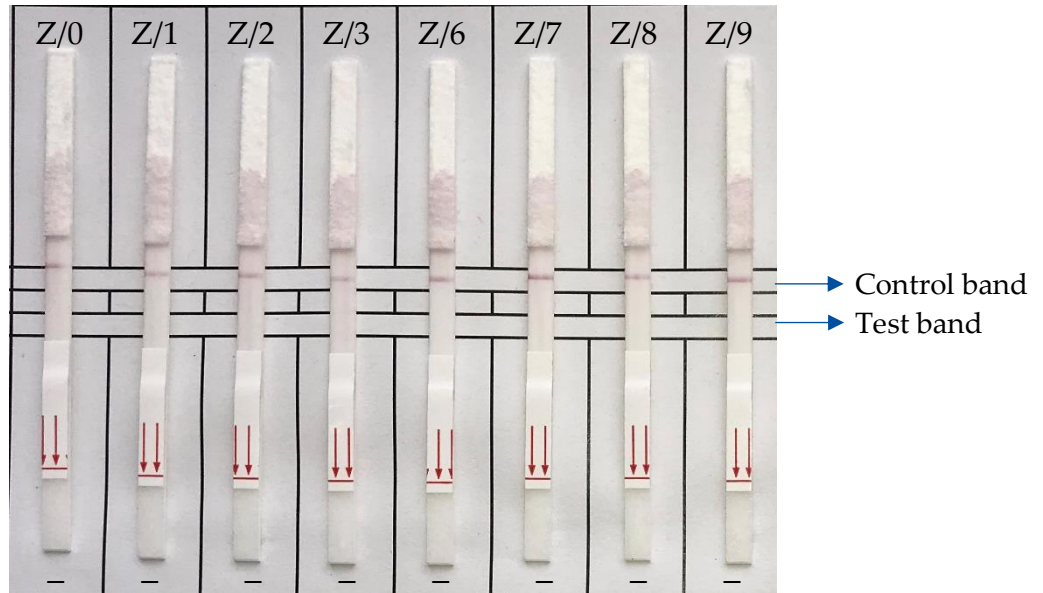

Conjunctival swab 17 dpv

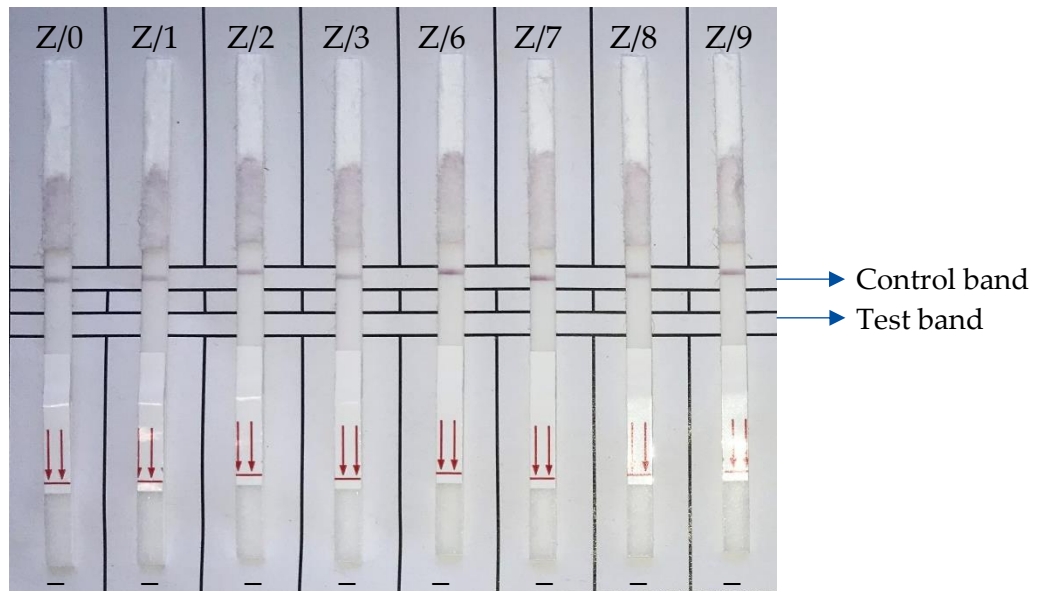

Conjunctival swab 21 dpv

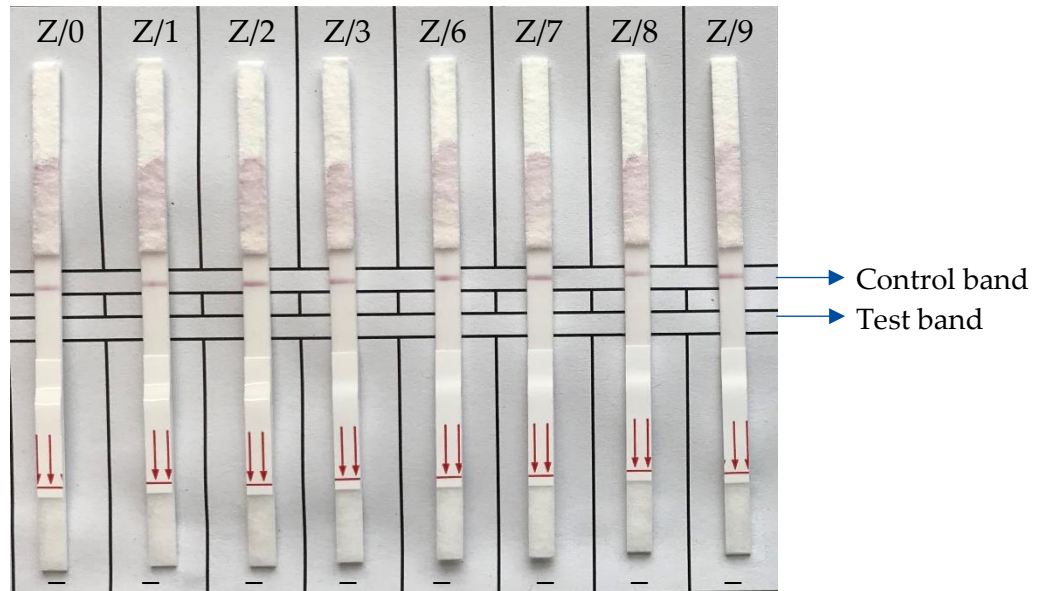

Conjunctival swab 24 dpv

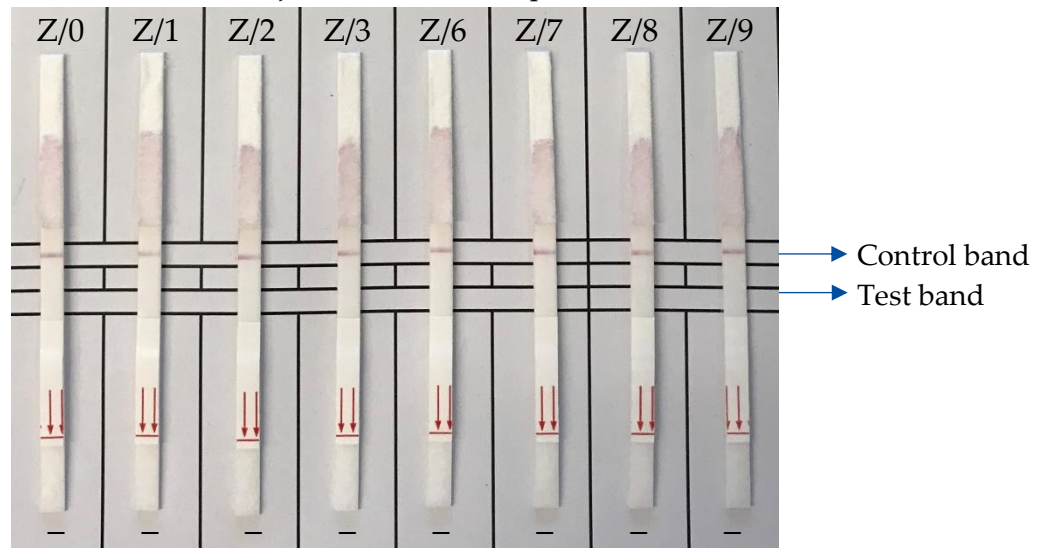

Conjunctival swab 28 dpv

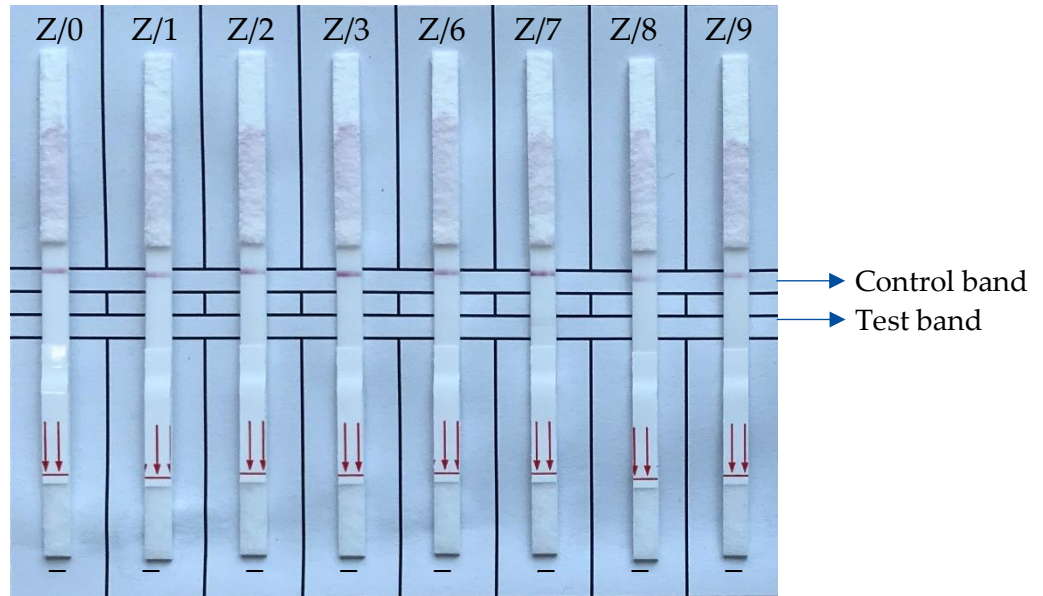

Supplement: s1 [file s1]
